# Supplementary material
Source: Springer Nature journal article supplement (https://www.springermedizin.de/resource/supplementary/13017_2009_129_MOESM1_ESM.pdf/9635530)

### Time of Admission (hours)

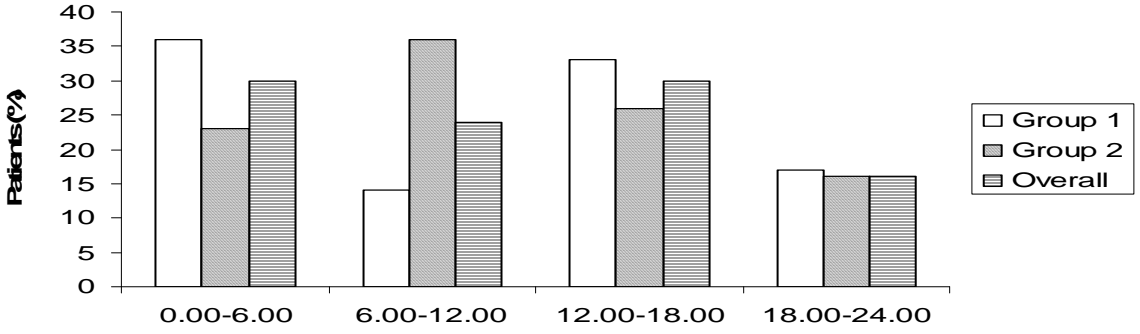

a

### Time of Operation (hours)

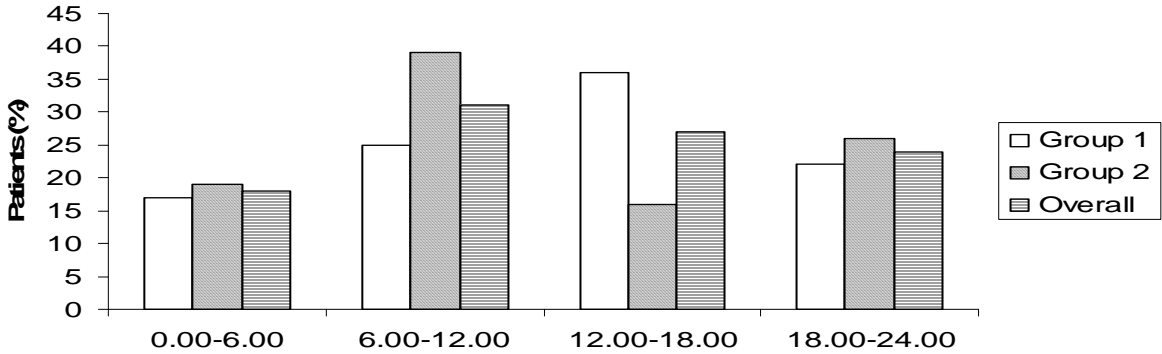

b

### Time to Operation (hours)

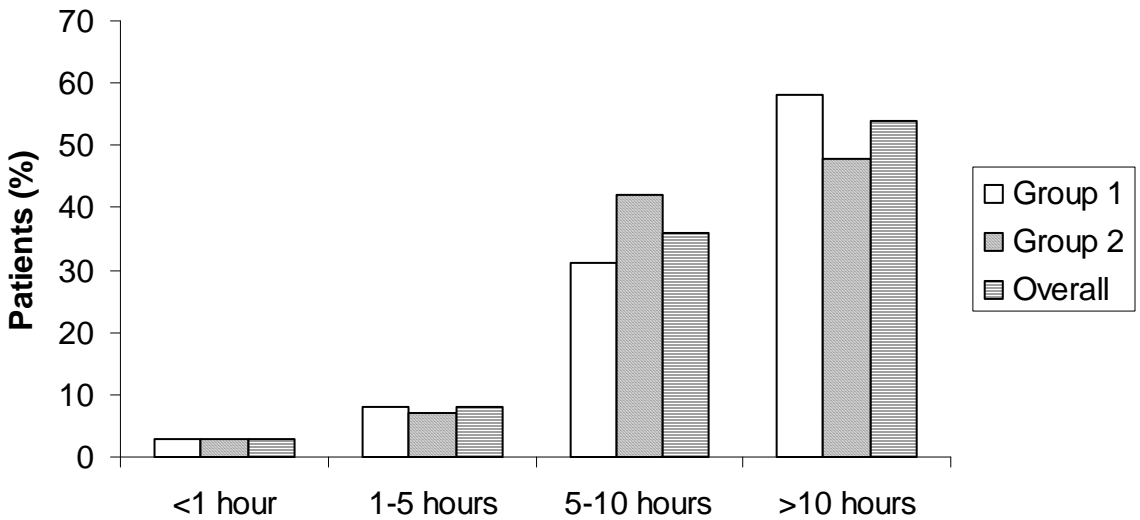

c

Supplement: MOESM1 [file 9635530]
